# Supplementary material for: Catalytic cleavage of C–O linkages in benzyl phenyl ether assisted by microwave heating
Source: Royal Society of Chemistry journal article supplement (doi:10.1039/c5ra04974a), 2015-01-01
Supplement: c5ra04974a1.pdf [file c5ra04974a1.pdf]

## Supplementary Information

### Catalytic cleavage of C–O linkages in benzyl phenyl ether assisted by microwave heating

Jun Hu, Dekui Shen, Shiliang Wu, Huiyan Zhang, and Rui Xiao\*

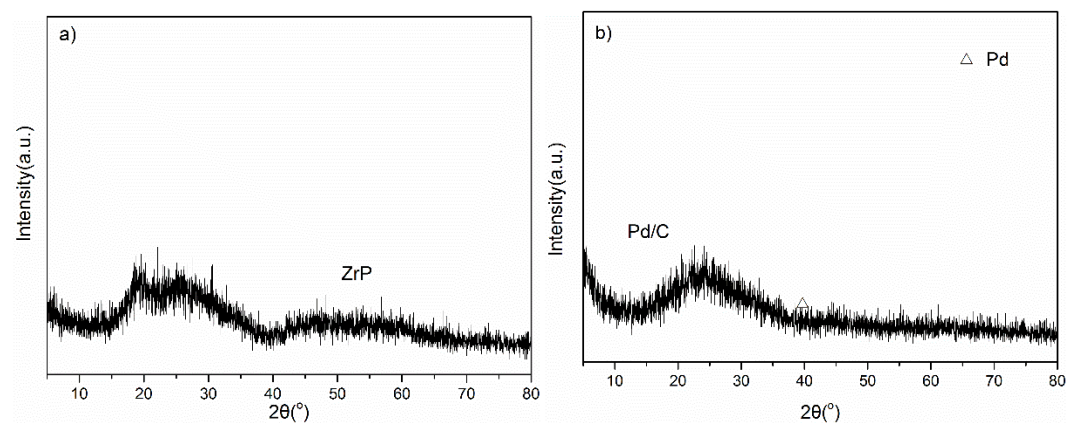

Figure S1. X-Ray diffractogram patterns of spent ZrP (a) and spent Pd/C (b)
